# Supplementary material for: Life stages differ in plasticity to temperature fluctuations and uniquely contribute to adult phenotype
Source: Oxford University Press journal article supplement (doi:10.1242/jeb.227884), 2020-01-01
Supplement: jeb227884supp.pdf [file jeb227884supp.pdf]

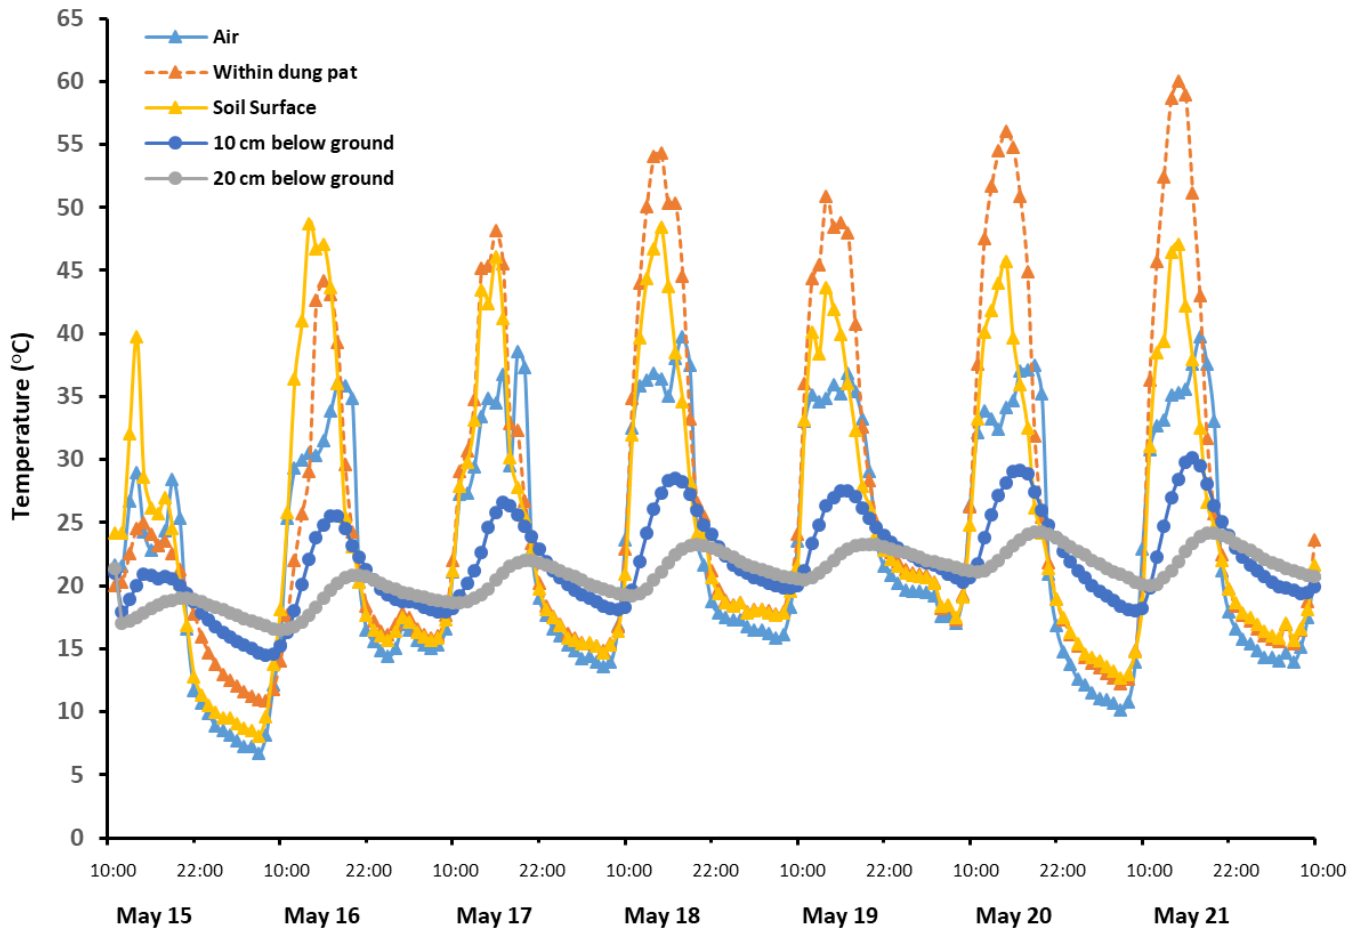

**Figure S1.** A snapshot of hourly temperature data depicting differences in thermal variability over one week during the active season for *Onthophagus taurus*. Adult microhabitats include air, within dung pat, and soil surface temperatures. Pupal microhabitats include temperatures at 10 and 20 cm below the soil surface where brood balls are typically located.

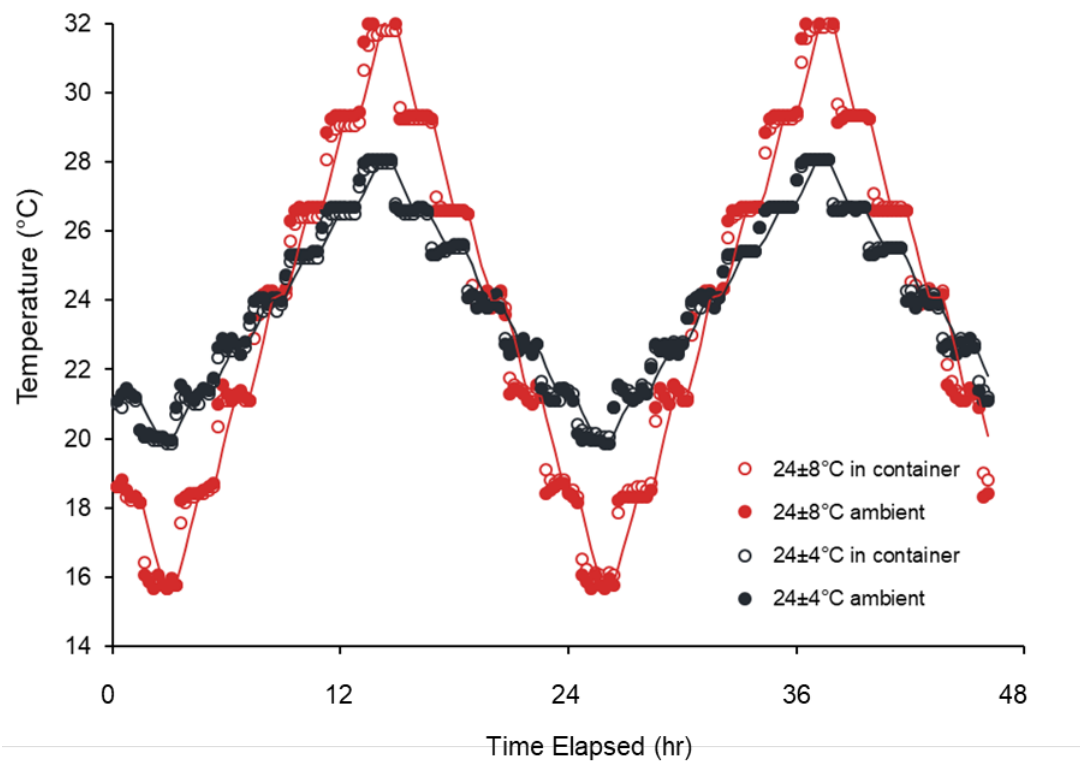

**Figure S2.** Ambient temperatures within the incubators (ambient, filled circles) do not differ from temperatures within the 2-ounce containers filled with moist soil (in container, open circles), which were used to house individual brood balls or adults, in either treatment. This demonstrates that realized temperatures of experimental individuals align with treatment temperatures.

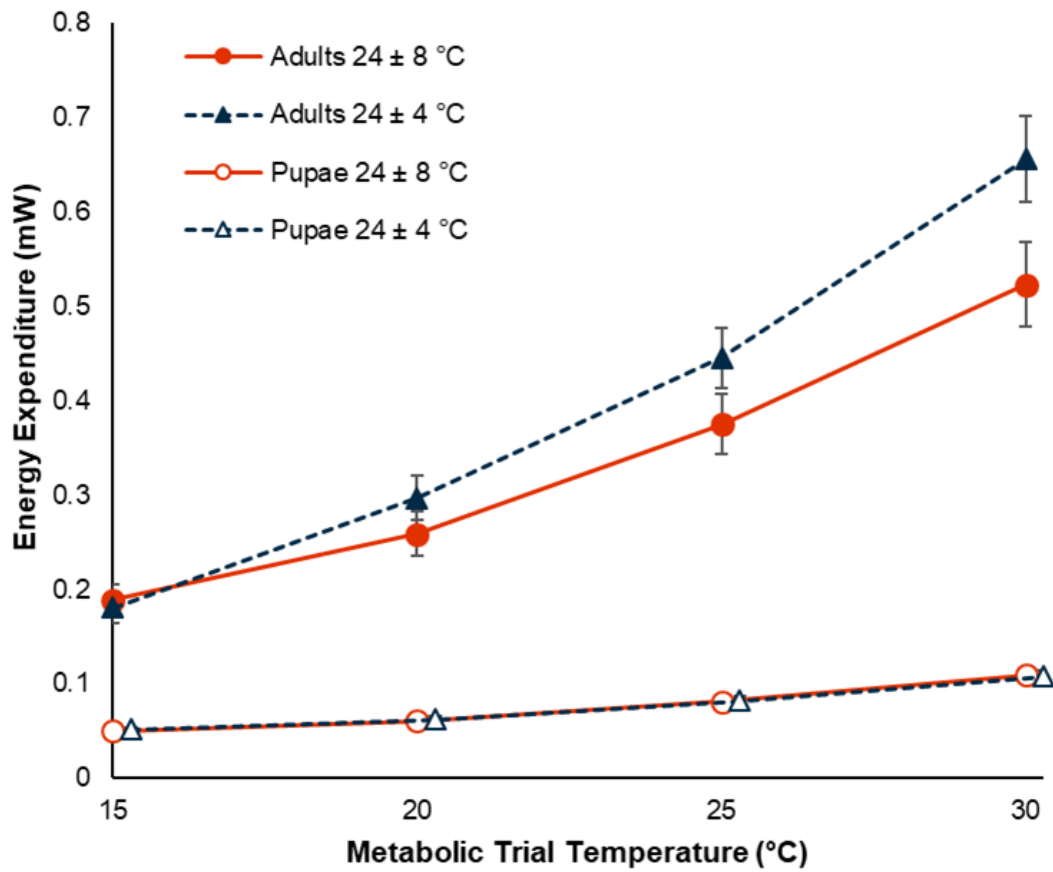

**Figure S3.** Using CO<sub>2</sub> production data and energy equivalents from Walsberg and Hoffman (2005), we calculated energy expenditure in milliwatts. Individual points are group means  $\pm$  1 standard error and calculations were made on untransformed data. Adults are represented with filled circles and pupae are represented with open circles. Individuals from the high temperature fluctuation treatment are depicted in red and those from the low temperature fluctuation treatment are depicted in navy.

Table S1. Solution for fixed effects: Do life stages differ in thermal plasticity to increased temperature fluctuation?

| <i>Effect</i>                                        | <i>Treatment</i>        | <i>Stage</i> | <i>Sex</i>        | <i>Estimate</i> | <i>Standard Error</i> | <i>df</i> | <i>t-value</i> | <i>p-value</i> |
|------------------------------------------------------|-------------------------|--------------|-------------------|-----------------|-----------------------|-----------|----------------|----------------|
| Intercept                                            |                         |              |                   | -0.00015        | 0.000077              | 115       | -1.94          | 0.0553         |
| Metabolic Trial Temperature                          |                         |              |                   | 3.01E-06        | 2.33E-06              | 74.9      | 1.29           | 0.2            |
| Treatment                                            | <i>High Fluctuation</i> |              |                   | -0.00001        | 0.000056              | 70.2      | -0.23          | 0.8175         |
| Treatment                                            | <i>Low Fluctuation</i>  |              |                   | 0               | .                     | .         | .              | .              |
| Treatment X Metabolic Trial Temperature              | <i>High Fluctuation</i> |              |                   | 2.19E-07        | 3.14E-06              | 74        | 0.07           | 0.9448         |
| Treatment X Metabolic Trial Temperature              | <i>Low Fluctuation</i>  |              |                   | 0               | .                     | .         | .              | .              |
| Life Stage                                           |                         | <i>Adult</i> |                   | -0.00025        | 0.000058              | 78.2      | -4.34          | <.0001         |
| Life Stage                                           |                         | <i>Pupa</i>  |                   | 0               | .                     | .         | .              | .              |
| Life Stage X Metabolic Trial Temperature             |                         | <i>Adult</i> |                   | 0.000031        | 3.12E-06              | 74.9      | 10.07          | <.0001         |
| Life Stage X Metabolic Trial Temperature             |                         | <i>Pupa</i>  |                   | 0               | .                     | .         | .              | .              |
| Treatment X Life Stage                               | <i>High Fluctuation</i> | <i>Adult</i> |                   | 0.000185        | 0.000078              | 70.5      | 2.39           | 0.0198         |
| Treatment X Life Stage                               | <i>High Fluctuation</i> | <i>Pupa</i>  |                   | 0               | .                     | .         | .              | .              |
| Treatment X Life Stage                               | <i>Low Fluctuation</i>  | <i>Adult</i> |                   | 0               | .                     | .         | .              | .              |
| Treatment X Life Stage                               | <i>Low Fluctuation</i>  | <i>Pupa</i>  |                   | 0               | .                     | .         | .              | .              |
| Treatment X Life Stage X Metabolic Trial Temperature | <i>High Fluctuation</i> | <i>Adult</i> |                   | -0.00001        | 4.33E-06              | 74.2      | -2.4           | 0.0189         |
| Treatment X Life Stage X Metabolic Trial Temperature | <i>High Fluctuation</i> | <i>Pupa</i>  |                   | 0               | .                     | .         | .              | .              |
| Treatment X Life Stage X Metabolic Trial Temperature | <i>Low Fluctuation</i>  | <i>Adult</i> |                   | 0               | .                     | .         | .              | .              |
| Treatment X Life Stage X Metabolic Trial Temperature | <i>Low Fluctuation</i>  | <i>Pupa</i>  |                   | 0               | .                     | .         | .              | .              |
| Sex                                                  |                         |              | <i>Female</i>     | -0.00002        | 0.00006               | 73.2      | -0.42          | 0.6779         |
| Sex                                                  |                         |              | <i>Major Male</i> | -0.00006        | 0.000061              | 73.6      | -0.99          | 0.326          |
| Sex                                                  |                         |              | <i>Minor Male</i> | 0               | .                     | .         | .              | .              |
| Mass                                                 |                         |              |                   | 0.001398        | 0.000352              | 73.7      | 3.98           | 0.0002         |

Note: The pupal life stage, the low fluctuation treatment, and minor males serve as the reference effects, so any higher order effects that include these effects are also zero.

Table S2. Solution for fixed effects: Do temperature fluctuations during early life stages carry-over to affect adult plasticity and phenotype?

| <i>Effect</i>                                         | <i>Temperature Treatment</i> | <i>Metabolic Trial Temperature</i> | <i>Estimate</i> | <i>Standard Error</i> | <i>df</i> | <i>t-value</i> | <i>p-value</i> |
|-------------------------------------------------------|------------------------------|------------------------------------|-----------------|-----------------------|-----------|----------------|----------------|
| Intercept                                             |                              |                                    | 0.000688        | 0.00006               | 119       | 11.5           | <.0001         |
| Metabolic Trial Temperature                           |                              | 15                                 | -0.00063        | 0.000042              | 61.5      | -14.88         | <.0001         |
| Metabolic Trial Temperature                           |                              | 20                                 | -0.00059        | 0.00004               | 59.3      | -14.95         | <.0001         |
| Metabolic Trial Temperature                           |                              | 25                                 | -0.00029        | 0.000031              | 67        | -9.13          | <.0001         |
| Metabolic Trial Temperature                           |                              | 30                                 | 0               | .                     | .         | .              | .              |
| Adult Treatment                                       | <i>High Fluctuation</i>      |                                    | -0.00004        | 0.000049              | 63.4      | -0.82          | 0.4179         |
| Adult Treatment                                       | <i>Low Fluctuation</i>       |                                    | 0               | .                     | .         | .              | .              |
| Developmental Treatment                               | <i>High Fluctuation</i>      |                                    | -0.00005        | 0.000049              | 65.2      | -1.03          | 0.3087         |
| Developmental Treatment                               | <i>Low Fluctuation</i>       |                                    | 0               | .                     | .         | .              | .              |
| Adult Treatment X Metabolic Trial Temperature         | <i>High Fluctuation</i>      | 15                                 | -3.51E-06       | 0.00005               | 63        | -0.07          | 0.9436         |
| Adult Treatment X Metabolic Trial Temperature         | <i>High Fluctuation</i>      | 20                                 | 0.000027        | 0.000046              | 60.8      | 0.59           | 0.5601         |
| Adult Treatment X Metabolic Trial Temperature         | <i>High Fluctuation</i>      | 25                                 | -0.00006        | 0.000037              | 68.1      | -1.64          | 0.1066         |
| Adult Treatment X Metabolic Trial Temperature         | <i>High Fluctuation</i>      | 30                                 | 0               | .                     | .         | .              | .              |
| Adult Treatment X Metabolic Trial Temperature         | <i>Low Fluctuation</i>       | 15                                 | 0               | .                     | .         | .              | .              |
| Adult Treatment X Metabolic Trial Temperature         | <i>Low Fluctuation</i>       | 20                                 | 0               | .                     | .         | .              | .              |
| Adult Treatment X Metabolic Trial Temperature         | <i>Low Fluctuation</i>       | 25                                 | 0               | .                     | .         | .              | .              |
| Adult Treatment X Metabolic Trial Temperature         | <i>Low Fluctuation</i>       | 30                                 | 0               | .                     | .         | .              | .              |
| Developmental Treatment X Metabolic Trial Temperature | <i>High Fluctuation</i>      | 15                                 | 0.00004         | 0.000049              | 63.3      | 0.8            | 0.4261         |
| Developmental Treatment X Metabolic Trial Temperature | <i>High Fluctuation</i>      | 20                                 | 0.000062        | 0.000046              | 61.1      | 1.34           | 0.1852         |
| Developmental Treatment X Metabolic Trial Temperature | <i>High Fluctuation</i>      | 25                                 | 3.79E-06        | 0.000037              | 68.3      | 0.1            | 0.9179         |
| Developmental Treatment X Metabolic Trial Temperature | <i>High Fluctuation</i>      | 30                                 | 0               | .                     | .         | .              | .              |
| Developmental Treatment X Metabolic Trial Temperature | <i>Low Fluctuation</i>       | 15                                 | 0               | .                     | .         | .              | .              |
| Developmental Treatment X Metabolic Trial Temperature | <i>Low Fluctuation</i>       | 20                                 | 0               | .                     | .         | .              | .              |
| Developmental Treatment X Metabolic Trial Temperature | <i>Low Fluctuation</i>       | 25                                 | 0               | .                     | .         | .              | .              |
| Developmental Treatment X Metabolic Trial Temperature | <i>Low Fluctuation</i>       | 30                                 | 0               | .                     | .         | .              | .              |
| Mass                                                  |                              |                                    | 0.002334        | 0.00046               | 70        | 5.08           | <.0001         |

Notes: The 30 °C and the low fluctuation treatments serve as the reference effects, so any higher order effects that include these effects are also zero.

This table corresponds to the model where metabolic trial temperature is characterized as a fixed (categorical) effect.

Table S3. Solution for fixed effects: Do temperature fluctuations during early life stages carry-over to affect adult plasticity and phenotype?

| <i>Effect</i>           | <i>Temperature Treatment</i> | <i>Estimate</i> | <i>Standard Error</i> | <i>df</i> | <i>t-value</i> | <i>p-value</i> |
|-------------------------|------------------------------|-----------------|-----------------------|-----------|----------------|----------------|
| Intercept               |                              | -0.00046        | 0.000052              | 110       | -8.86          | <.0001         |
| Metabolic Trial         |                              |                 |                       |           |                |                |
| Temperature             |                              | 0.00003         | 1.47E-06              | 68.1      | 20.48          | <.0001         |
| Developmental Treatment | <i>High Fluctuation</i>      | 7.83E-06        | 0.000018              | 70.1      | 0.44           | 0.6581         |
| Developmental Treatment | <i>Low Fluctuation</i>       | 0               | .                     | .         | .              | .              |
| Adult Treatment         | <i>High Fluctuation</i>      | -0.00003        | 0.000017              | 70        | -1.61          | 0.1125         |
| Adult Treatment         | <i>Low Fluctuation</i>       | 0               | .                     | .         | .              | .              |
| Mass                    |                              | 0.002309        | 0.000458              | 70        | 5.04           | <.0001         |

Notes: The low fluctuation treatment serves as the reference effect.

This table corresponds to the model where metabolic trial temperature is characterized as a continuous effect (covariate).
